# Supplementary material for: Enhanced Stability and Mechanical Properties of a Graphene–Protein Nanocomposite Film by a Facile Non-Covalent Self-Assembly Approach
Source: MDPI journal article supplement (doi:10.3390/nano12071181), 2022-04-01
Supplement: s1 [file s1]

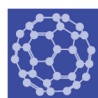

## Supplementary Materials

# Enhanced Stability and Mechanical Properties of a Graphene–Protein Nanocomposite Film by a Facile Non-Covalent Self-Assembly Approach

Chunbao Du<sup>1</sup>, Ting Du<sup>1</sup>, Joey Tianyi Zhou<sup>3</sup>, Yanan Zhu<sup>1</sup>, Xingang Jia<sup>1</sup> and Yuan Cheng<sup>2,4,\*</sup>

<sup>1</sup> College of Chemistry and Chemical Engineering, Xi'an Shiyou University, Xi'an 710065, China; duchunbao218@126.com (C.D.); duting102@126.com (T.D.); zhuyan@xsyu.edu.cn (Y.Z.); jiaxingang76@xsyu.edu.cn (X.J.)

<sup>2</sup> Monash Suzhou Research Institute, Monash University, Suzhou Industrial Park, Suzhou 215000, China

<sup>3</sup> Institute of High Performance Computing, A\*STAR, Singapore 138632, Singapore; joey\_zhou@ihpc.a-star.edu.sg

<sup>4</sup> Department of Materials Science and Engineering, Monash University, Clayton, VIC 3800, Australia

\* Correspondence: yuan.cheng@monash.edu

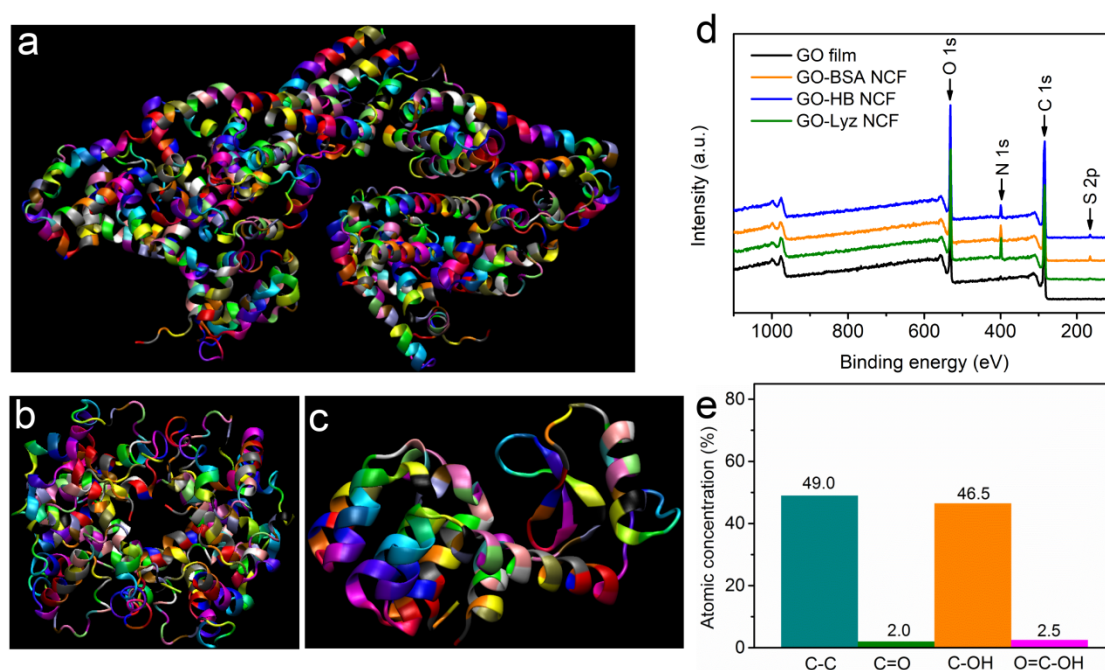

**Figure S1.** The crystal structures of BSA (a, PDB code 4F5S), HB (b, PDB code 1FN3) and Lyz (c, PDB code 253L) with the style of newcartoon; wide scan of XPS survey spectra of films (d); atomic concentration of C in GO film (e).

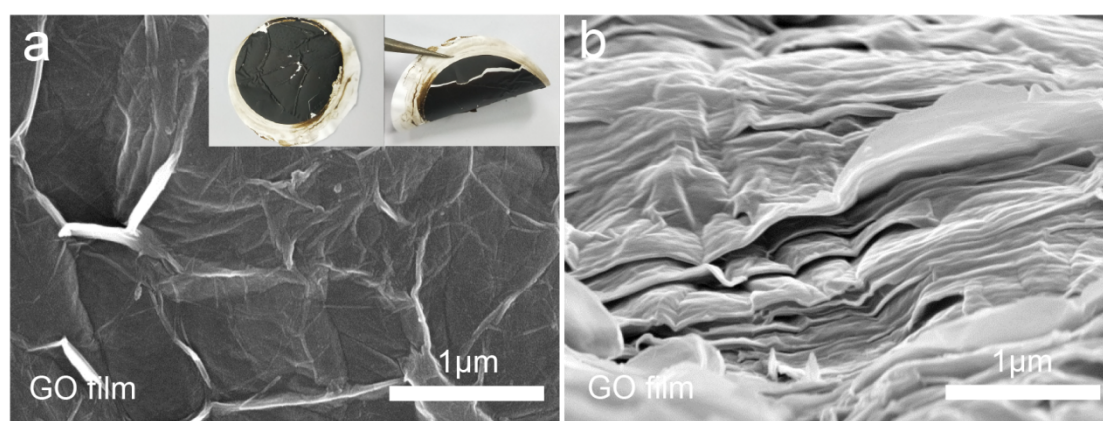

**Figure S2.** SEM images of surface (a), photographs with uniform diameter of about 5 cm (insets of a) and internal cross section (b) of GO film.

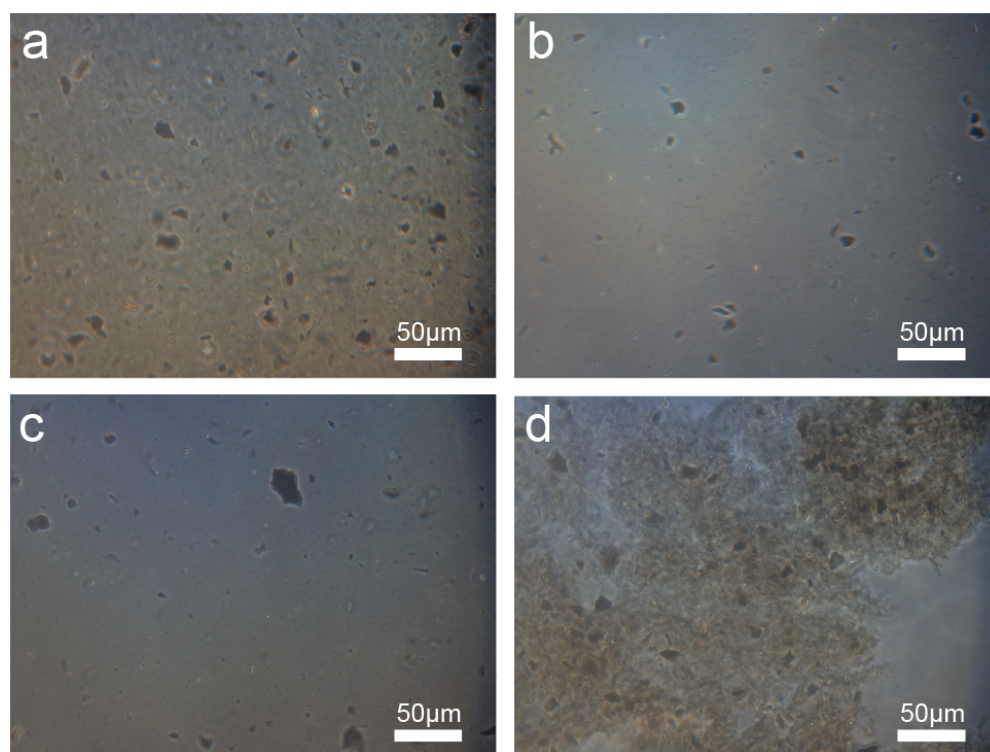

**Figure S3.** Optical microscope photographs of GO solution (a), GO-BSA compound solution (b), GO-HB compound solution (c) and GO-Lyz compound solution (d).

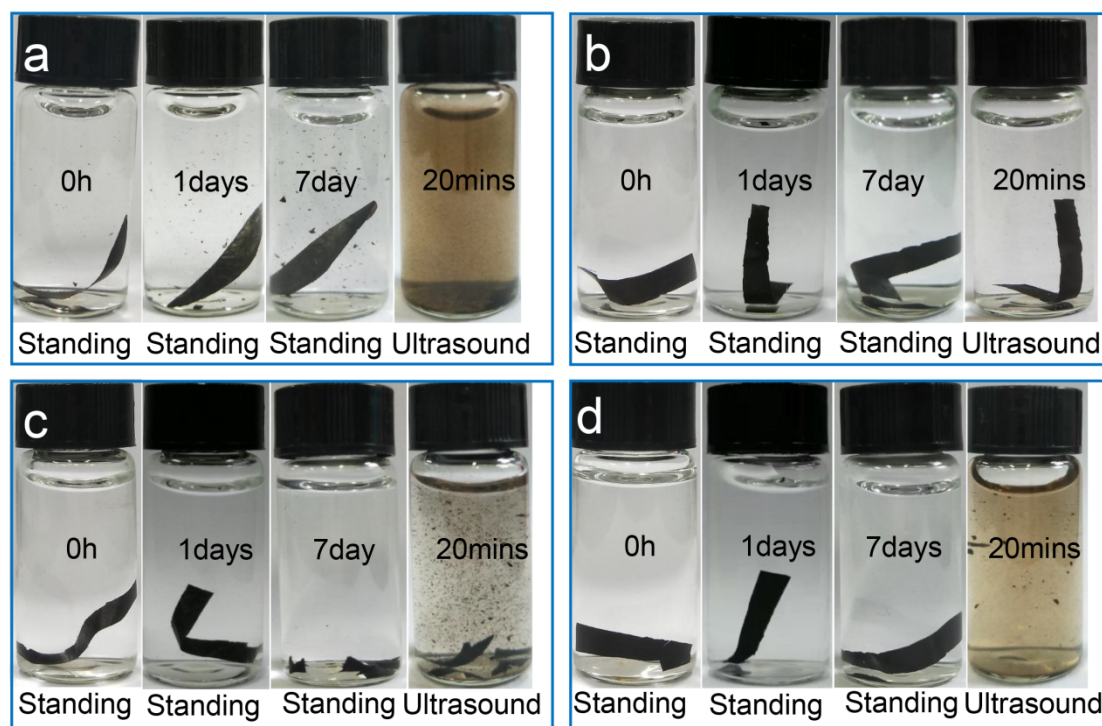

**Figure S4.** The stability of GO film in aqueous (a), HCl (b), NaOH (c) and NaCl solution (d) with different treatment at room temperature.
